# Supplementary material
Source: PubMed Central journal article supplement (PMC5477008)
Supplement: sb7b00037_si_001.pdf [file sb7b00037_si_001.pdf]

# Supporting information for: *Construction of a chassis for a tripartite protein-based molecular motor*

Corresponding author Email address: [e.h.c.bromley@durham.ac.uk](mailto:e.h.c.bromley@durham.ac.uk)

## Section 1. Additional Circular Dichroism Data

Figure 1(a) shows the CD spectrum for each of the individual peptides, p1, p2, p3, p4, p5 and p6, in solution on their own. A small amount of homodimer formation is present in samples p3 and p4.

Figure 1(b) shows the CD spectrum for combinations of the disulfide linked two domain peptides, including p6-1, p2-3 and p4-5 individually, mixtures of pairs including p6-1 with p2-3, p6-1 with p4-5 and p2-3 with p4-5, and finally the mixture of all 3 linked peptides.

Figure S1

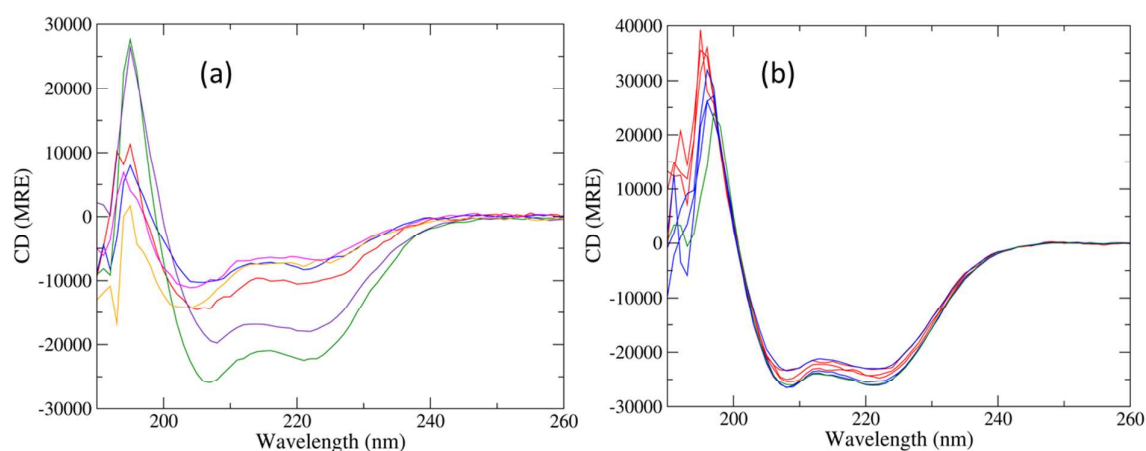

(a) Individual CD spectra for the six Y hub peptides (1 to 6), each measured at 20  $\mu$ M concentration in PBS buffer (pH 7.4), at 20  $^{\circ}$ C. The peptides 1 to 6 are shown in red, blue, green, purple, orange and magenta respectively. (b) CD data of the disulfide bonded peptides. The red spectra are the single disulfide bonded peptides, p6-1, p2-3 and p4-5, while the blue spectra are for the pairs of disulfide bonded peptides, p6-1 with p2-3, p2-3 with p4-5 and p4-5 with p6-1. The green spectrum is the mixture of all three disulfide bonded peptides

## Section 2. Dynamic Light Scattering data

Dynamic light scattering data was collected on the designed coiled-coil pairs as well as the individual disulfide linked peptides and their pairwise combinations. Finally data was collected for the mixture of all three disulfide linked peptides.

Figure S2 shows the normalised intensity of the peaks of hydrodynamic diameter resulting from the DLS measurement. This indicates that the hydrodynamic diameter is between 2 and 3 nm for the designed coiled-coil pairs as expected.

Figure S3 shows the normalised intensity of the peaks of hydrodynamic diameter resulting from the DLS measurement of the individual disulfide linked peptides and their mixtures. These data indicate that the individual peptides have hydrodynamic diameters between 3 and 4 nanometers, which is

consistent with them having folded into intramolecular anti-parallel coiled coils. The pairs of linked peptides contain structures with hydrodynamic diameters between 4 and 6 nanometers. This is consistent with the formation of intermolecular dimers extending the full length of the peptides (7 or 8 heptad repeats). The mixture of all three linked peptides shows a peak centered on a hydrodynamic diameter of 5 nm. This peak has a much smaller width indicating a more compact or symmetric structure and is therefore consistent with the formation of the designed tripartite hub.

Figure S2

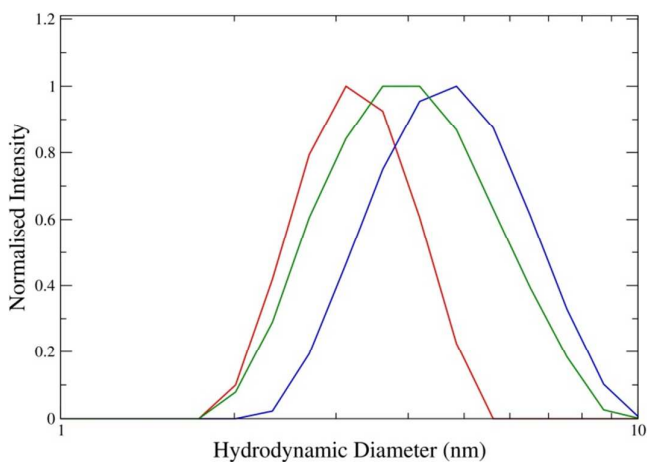

DLS data of the designed peptide pairs. Shown are representative measurements of p1,p2 (red), p3,p4 (blue) and p5,p6 (green)

Figure S3

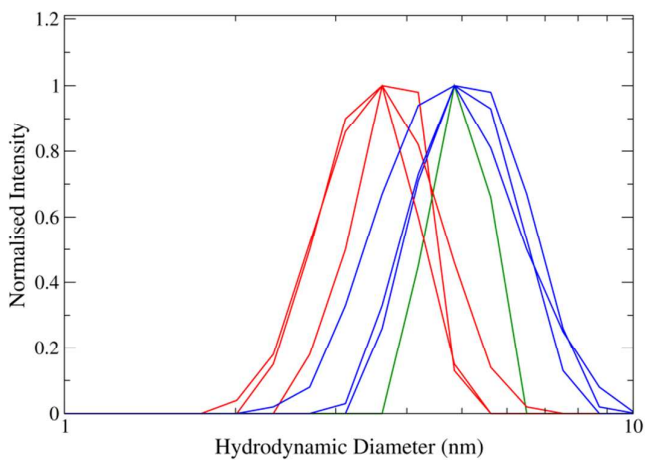

DLS data of the disulphide-bonded peptides. The red peaks are representative measurements of the disulfide bonded peptides, p6-1, p2-3 and p4-5, while the blue peaks are the pairs of disulfide bonded peptides, (p6-1, p2-3), (p2-3, p4-5) and (p4-5, p6-1). The green peak is the mixture of all three disulfide bonded peptides.

### Section 3. AUC fitting information

The values for  $\bar{v}$ , the partial specific volume of the protein, used in the AUC data fitting are given in tables S1 and S2.

Table S1.

| Sample | Expected Molecular Weight / Da | Measured Molecular Weight / Da | $\bar{v}$ |
|--------|--------------------------------|--------------------------------|-----------|
| p1,p2  | 7041                           | 7000 $\pm$ 1000                | 0.7567    |
| p3,p4  | 7397                           | 7100 $\pm$ 1000                | 0.7467    |
| p5,p6  | 5816                           | 5900 $\pm$ 1000                | 0.7640    |

Table S2

| Sample           | Expected Heterodimeric Molecular Weight / Da | Measured Molecular Weight / Da | $\bar{v}$ |
|------------------|----------------------------------------------|--------------------------------|-----------|
| p6-1             | 6470                                         | 7300 $\pm$ 1000                | 0.746     |
| p2-3             | 7096                                         | 9700 $\pm$ 1000                | 0.7482    |
| p4-5             | 6682                                         | 7600 $\pm$ 1000                | 0.7458    |
| p6-1, p2-3       | 13566                                        | 16000 $\pm$ 1000               | 0.7467    |
| p2-3, p4-5       | 13778                                        | 14000 $\pm$ 1000               | 0.7467    |
| p4-5, p6-1       | 13151                                        | 16000 $\pm$ 1000               | 0.7460    |
| p6-1, p2-3, p4-5 | 20248                                        | 19000 $\pm$ 1000               | 0.7460    |

#### Section 4. MALDI Data

In this section we present the detailed information from the disulfide exchange experiment, showing the assignment of the peaks seen in the pre-rearrangement data figure in the paper.

Table S3

| MALDI peak Mass | Species Assignment        | Species Mass | Notes                                                         |
|-----------------|---------------------------|--------------|---------------------------------------------------------------|
| 5826.6          | 6-6                       | 5826         | Absent post-rearrangement                                     |
| 6469.5          | p6-1                      | 6470         |                                                               |
| 6567.8          | p4-5 (M-114)              | 6568         | Single residue deletion of p4-5, seen in MALDI of p4-5 alone  |
| 6681.9          | p4-5                      | 6682         |                                                               |
| 6704.4          | p4-5 (M+Na <sup>+</sup> ) | 6704         | Single residue insertion of p4-5, seen in MALDI of p4-5 alone |
| 6810.3          | p4-5 (M+128)              | 6810         | Single residue insertion of p4-5, seen in MALDI of p4-5 alone |
| 7095.1          | p2-3                      | 7096         |                                                               |
| 7117.5          | p2-3 (M+Na <sup>+</sup> ) | 7118         |                                                               |
| 7224.0          | p2-3 (M+128)              | 7224         | Single residue insertion of p2-3, seen in MALDI of p2-3 alone |
| 7356.4          | unassigned                | -            | Unassigned contaminant seen in the p2-3 MALDI                 |
